# Supplementary material for: Last Glacial Maximum led to community-wide population expansion in a montane songbird radiation in highland Papua New Guinea
Source: PubMed Central journal article supplement (PMC7353695; doi:10.1186/s12862-020-01646-z), 2020-07-11

- *Aethomyias papuensis*
- *Aethomyias arfakianus*
- *Aethomyias perspicillatus*
- *Aethomyias spilodera*
- *Sericornis nouhuysi*
- *Sericornis magnirostris*
- *Sericornis frontalis*
- *Neosericornis citreogularis*
- *Origma robusta*

A)

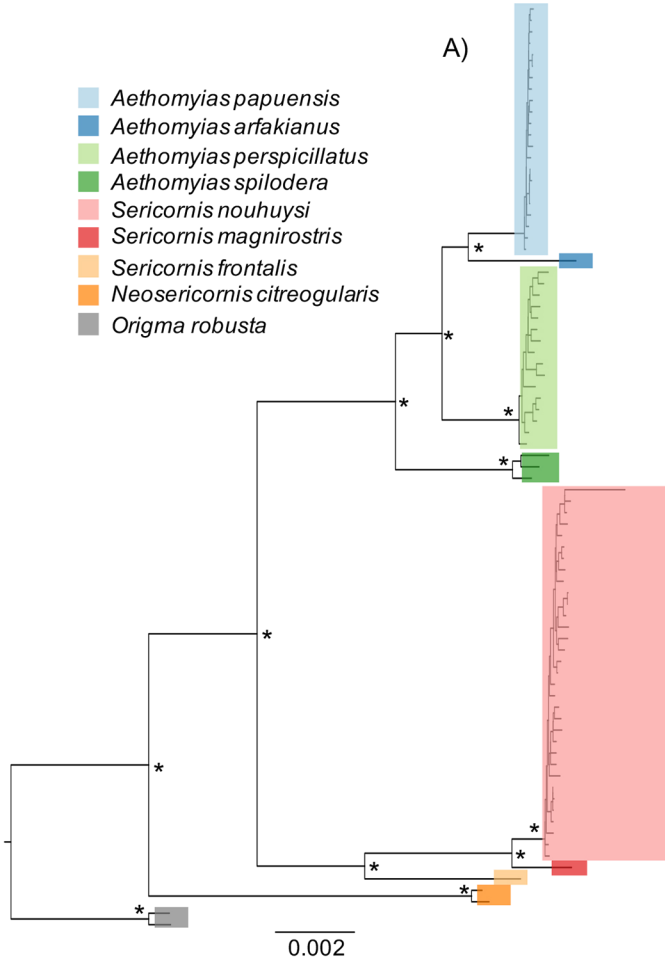

B)

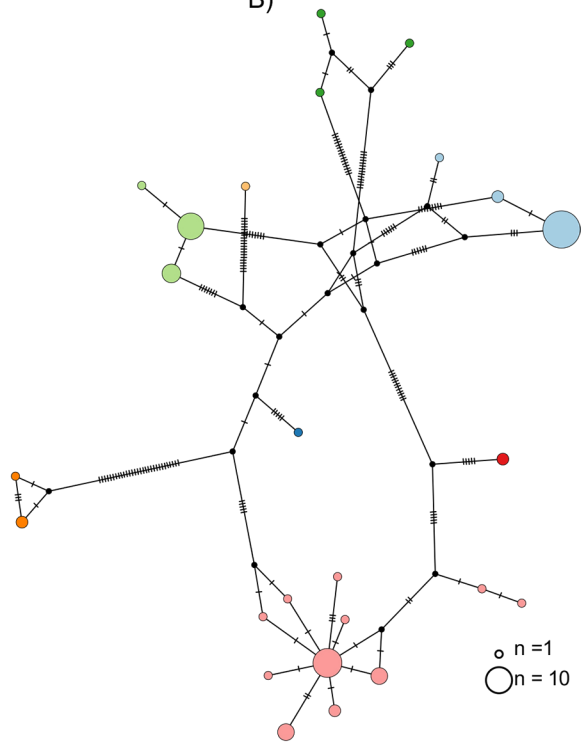

Supplement: 12862_2020_1646_MOESM1_ESM.pdf [file 12862_2020_1646_MOESM1_ESM.pdf]
