# Supplementary material for: Last Glacial Maximum led to community-wide population expansion in a montane songbird radiation in highland Papua New Guinea
Source: PubMed Central journal article supplement (PMC7353695; doi:10.1186/s12862-020-01646-z), 2020-07-11

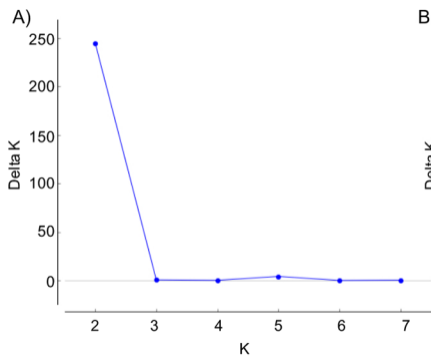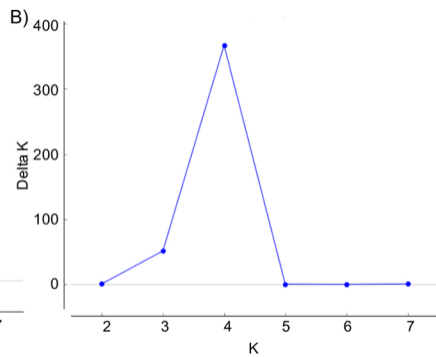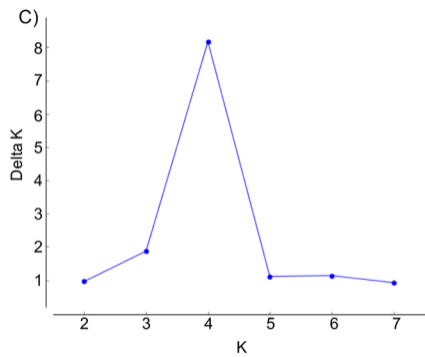

Supplement: 12862_2020_1646_MOESM2_ESM.pdf [file 12862_2020_1646_MOESM2_ESM.pdf]
